# Supplementary material for: MicroRNA-375/SEC23A as biomarkers of the in vitro efficacy of vandetanib
Source: PubMed Central journal article supplement (PMC5058693; doi:10.18632/oncotarget.8458), 2016-03-29
Supplement: oncotarget-07-30461-s001.pdf [file oncotarget-07-30461-s001.pdf]

## MicroRNA-375/SEC23A as biomarkers of the *in vitro* efficacy of vandetanib

### SUPPLEMENTARY FIGURES AND TABLES

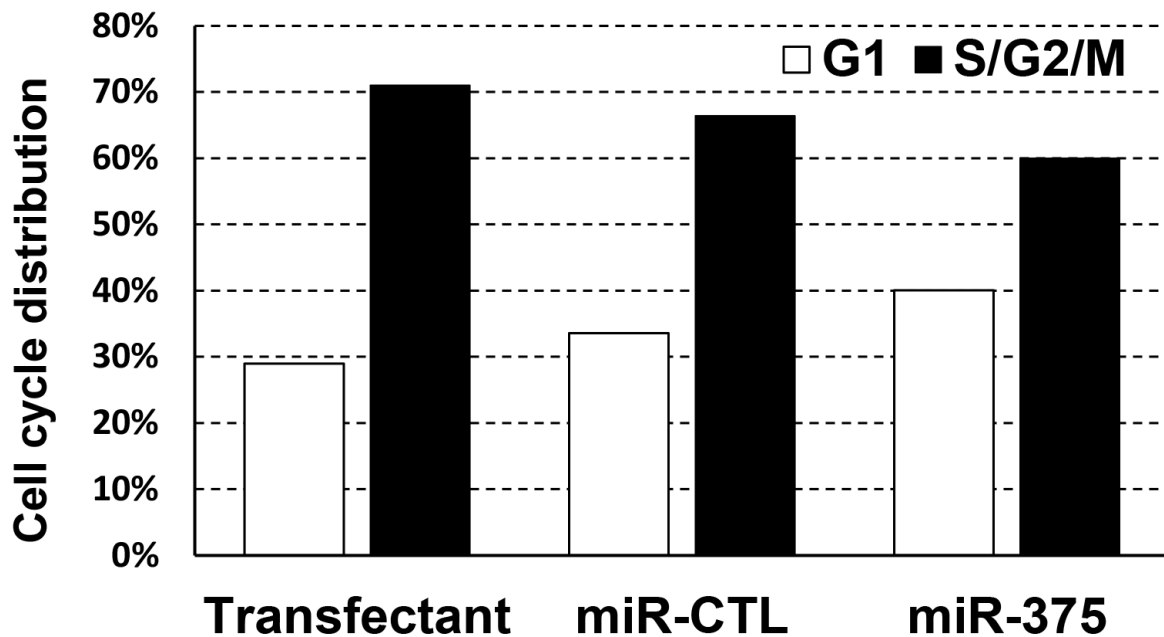

Supplementary Figure S1: Nthy-ori 3-1 - FUCCI2A cells were seeded and transfected with pre-miR-375 or pre-miR-CTL at 20pM for 24h. Cells were then harvested and analyzed by flow cytometry as described in the Material and methods.

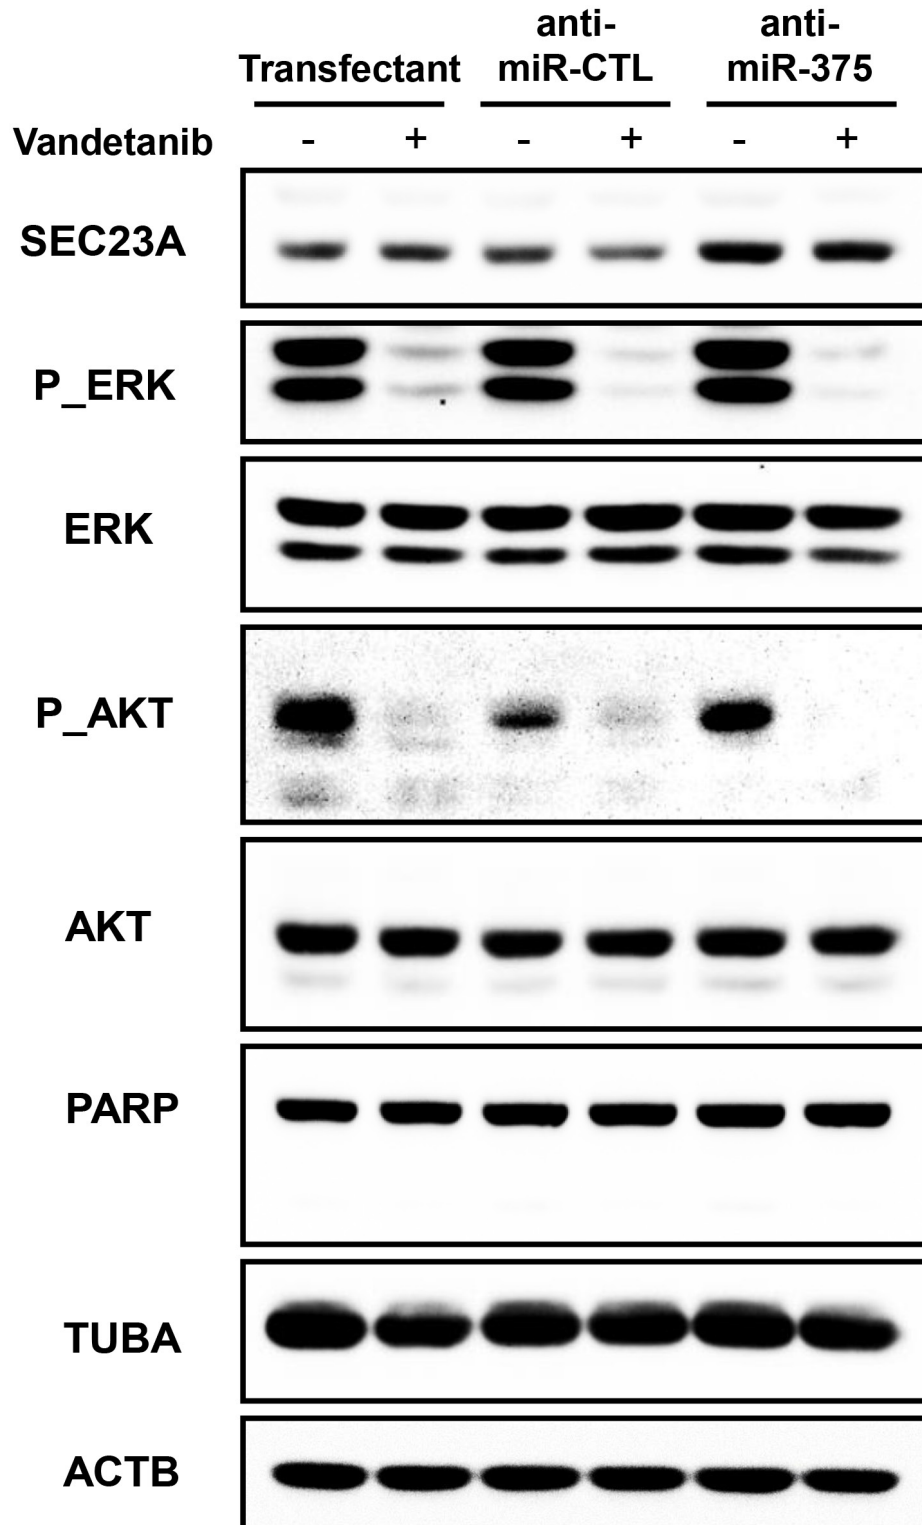

Supplementary Figure S2: TT cells were seeded and transfected with antagomiR-375 (anti-miR-375) or antagomiR-CTL (anti-miR-CTL) for 24h and vandetanib was then added for 48h. Quantification of propidium iodide positive TT cells. Quantification of ERK, AKT pathways and PARP cleavage was performed by immunoblotting. Tubulin (TUBA) and actin B (ACTB) protein levels were used as loading controls.

Supplementary Table S1: List of different primers used for qPCR analysis

| MicroRNAs   | Target sequences                                                  | Applied references |
|-------------|-------------------------------------------------------------------|--------------------|
| Hsa-miR-375 | UUUGUUCGUUCGGCUCGCGUGA                                            | 000564             |
| Hsa-miR-451 | AAACCGUUACCAUUACUGAGUU                                            | 001105             |
| RNU 19      | TTGCACCTCTGAGAGTGGAATGACTCCTGTGGAGTT<br>GATCCTAGTCTGGGTGCAAACAATT | 001003             |

**Supplementary Table S2: The transcriptome microarray expression profile for the set of 22 genes (24 probe-sets) down-regulated in NThy-ori 3-1 pre-mir-375 transfected cells and up-regulated in the TT antagomir-375 transfected cells**

See Supplementary File S1

**Supplementary Table S3: Genes under-expressed in the TT cell line and predicted as strong targets of miR-375**

See Supplementary File S2

Supplementary Table S4: Overview of the studies that performed a miRNA analysis of MTC

| Authors                       | Results                                                                                                                          | Prognostic value                                                                                                                                        |
|-------------------------------|----------------------------------------------------------------------------------------------------------------------------------|---------------------------------------------------------------------------------------------------------------------------------------------------------|
| Abraham <i>et al.</i> 2011    | Over-expression of miR-182, -183, -375, -551b and down-regulation of miR-199b-5p, -9, -9*, -223, let-7i, miR-23a in SMTC vs HMTC | miR-183 and -375 associated with<br>- lymph node metastases<br>- residual disease<br>- mortality                                                        |
| Duan <i>et al.</i> 2014       | Down-regulation of miR-129-5p                                                                                                    |                                                                                                                                                         |
| Gundara <i>et al.</i> 2014    | Primary tumor and nodal metastases miRNA relative expression correlation for miR-9*, -183 and -375                               |                                                                                                                                                         |
| Hudson <i>et al.</i> 2013     | Over-expression of miR-375, -10a and down-regulation of miR-455                                                                  |                                                                                                                                                         |
| Mian <i>et al.</i> 2012       | Over-expression of miR-21, -127, -154, -224, -323, -370, -183, -375, -9*                                                         | miR-224 associated with<br>- absence of lymph node metastases<br>- lower stages at diagnosis<br>- biochemically-free status at the end of the follow-up |
| Nikiforova <i>et al.</i> 2008 | Over-expression of miR-323, -370, -129, -137, -10a, -124a, 224, 127, -9, -154.                                                   |                                                                                                                                                         |
| Pennelli <i>et al.</i> 2015   | Over-expression of miR-21                                                                                                        | Associated with high calcitonin levels, lymph node metastases, advanced stages, biochemically persistent disease                                        |
| Santarpia <i>et al.</i> 2013  | Over-expression of miR-130a, -138, -193a-3p, -373, -498 and down-regulation of miR-10a, -200b/-200c, -7, -29c in metastatic MTC  |                                                                                                                                                         |

Supplementary Table S5: Overview of miRNA studies performed on MTC

| Patients  | % C-Cells          |                    |     | $\Delta$ CT (CT-RNU19) |                    |       |
|-----------|--------------------|--------------------|-----|------------------------|--------------------|-------|
|           | Non tumoral tissue | C-Cell Hyperplasia | MTC | Non tumoral tissue     | C-Cell Hyperplasia | MTC   |
| Patient 1 | 0                  | 20                 | 90  | 3.68                   | 9.36               | 13.40 |
| Patient 2 | 0                  | 5                  | 40  | 2.40                   | 3.28               | 4.35  |
| Patient 3 | 0                  | 10                 | 90  | 0.25                   | 5.31               | 12.49 |
| Patient 4 | 0                  | 10                 | 70  | 2.97                   | 4.17               | 12.66 |
| Patient 5 | 0                  | 3                  | 90  | 4.03                   | 4.25               | 13.09 |
| Patient 6 | 0                  | 20                 | 70  | 3.70                   | 7.92               | 12.02 |
